# Supplementary material for: Gradually softening hydrogels for modeling hepatic stellate cell behavior during fibrosis regression
Source: Royal Society of Chemistry journal article supplement (doi:10.1039/c6ib00027d), 2016-01-01
Supplement: c6ib00027d1.pdf [file c6ib00027d1.pdf]

## **Gradually softening hydrogels for modeling hepatic stellate cell behavior during fibrosis regression**

Steven R. Caliari<sup>1</sup>, Maryna Perepelyuk<sup>2</sup>, Elizabeth M. Soulas<sup>1</sup>, Gi Yun Lee<sup>1</sup>, Rebecca G. Wells<sup>2</sup>,  
Jason A. Burdick<sup>1</sup>

<sup>1</sup> Department of Bioengineering  
<sup>2</sup> Department of Medicine  
University of Pennsylvania  
Philadelphia, PA 19104

### **Corresponding Authors:**

J.A. Burdick  
Department of Bioengineering  
University of Pennsylvania  
240 Skirkanich Hall  
210 S. 33<sup>rd</sup> St.  
Philadelphia, PA 19104  
Phone: (215) 898-8537  
Fax: (215) 573-2071  
email: burdick2@seas.upenn.edu

Rebecca G. Wells, MD  
Associate Professor of Medicine (Gastroenterology) and  
Pathology and Laboratory Medicine  
University of Pennsylvania School of Medicine  
905 BRB/6160  
421 Curie Blvd.  
Philadelphia, PA 19104  
Tel: (215) 573-1860  
Fax: (215) 573-2024  
email: rgwells@mail.med.upenn.edu

## Supplemental Figures

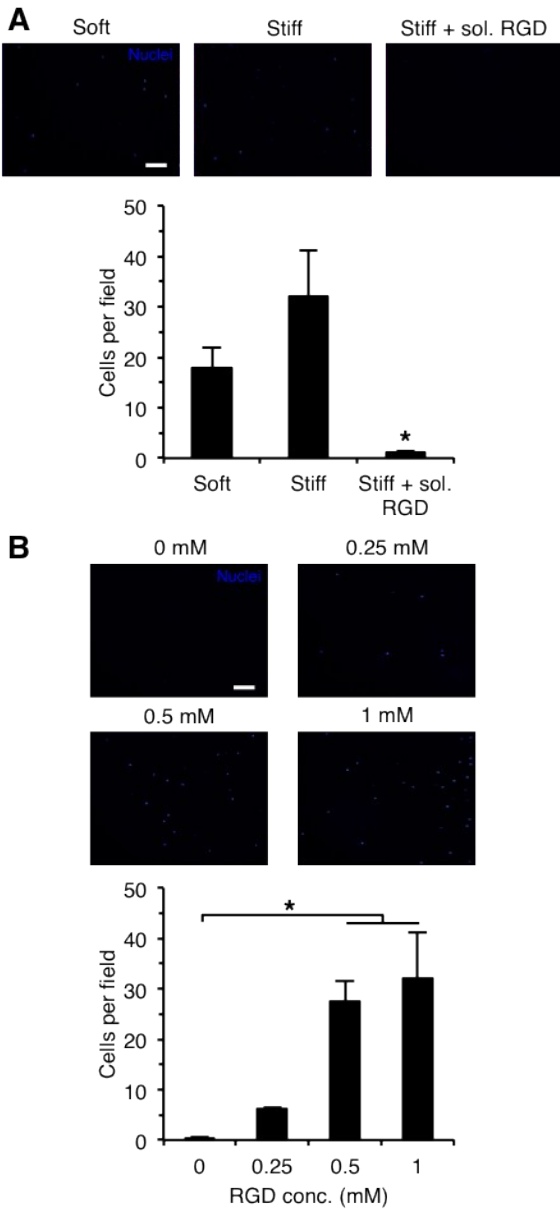

**Supplemental Figure 1. Hepatic stellate cell attachment to hyaluronic acid hydrogels is mediated by tethered RGD.** (A) Stellate cell attachment to soft and stiff HA hydrogels (1 mM covalently-tethered RGD, with or without 1 mM soluble RGD added to culture media). (B) Stellate cell attachment to stiff hydrogels with varying levels of covalently-attached RGD peptide (0, 0.25, 0.5, and 1 mM). *Blue*: nuclei. \*:  $P < 0.05$ . Scale bars: 500  $\mu$ m.

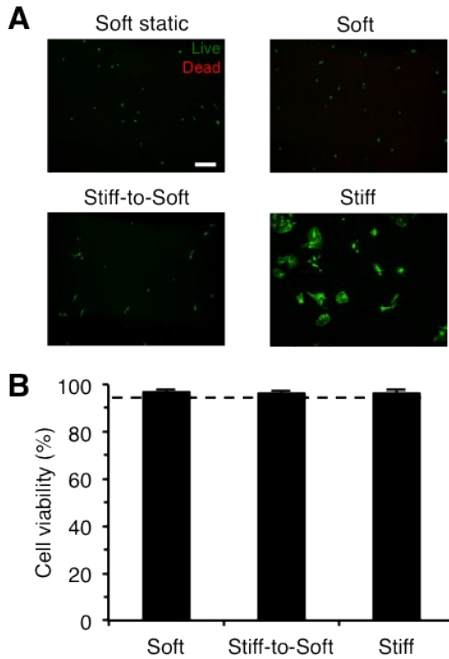

**Supplemental Figure 2. Hepatic stellate cells on HA hydrogels are viable.** (A) Representative images and (B) quantification of viability for stellate cells cultured for 21 days total on soft hydrogels (soft static, dashed lines) or 7 day mechanically primed stellate cells cultured for an additional 14 days on soft, stiff, or stiff-to-soft hydrogels. *Green*: live cells, *Red*: dead cells. (*Dashed lines*: soft static control). Scale bar: 500  $\mu\text{m}$ .
